# Supplementary material for: Optimal Taxation of Cigarettes and E-Cigarettes: Principles for Taxing Reduced-Harm Tobacco Products
Source: publisher site journal article supplement (doi:10.1515/fhep-2022-0025), 2023-12-01
Supplement: Supplementary file 1 [file j_fhep-2022-0025_suppl_001.docx]

# Online Appendix

This appendix contains a review of the empirical literature on demand for tobacco products, focusing on econometric estimates of elasticity of demand, and derivations of the equations presented in the text.

## Elasticity of demand for cigarettes and ENDS

Since many of the arguments in the text rely on the relative demand elasticities of cigarettes and ENDS, a review of the empirical literature on these magnitudes is presented here.

### Demand for cigarettes

Hundreds of studies, performed over decades, have estimated the price elasticity of demand for combustible cigarettes. Note first that this elasticity is not zero. Despite cigarettes being addictive and despite the fact that addiction often popularly assumed to be irrational behavior, the evidence that the Law of Demand—that higher prices lead to lower demand—applies to cigarettes is “overwhelming,” in the words of a highly respected tobacco control handbook (IARC, 2011).

Given the huge number of studies, the review here relies mainly on studies of these studies. Such meta-studies fall into two camps: narrative reviews relying on the expert judgment of the authors of the review and formal statistical syntheses based on meta-analysis. The most-cited narrative review in the literature on smoking is that of Chaloupka and Warner (2000), which concluded that most studies then to date produced price elasticities in a relatively narrow band (-0.3 to -0.5) centered around -0.4. A later, widely cited narrative review found that price elasticity as estimated from studies using aggregated data is “concentrated” in the range of -0.2 to -0.6 (IARC, 2011, p. 106). The same review further found that price elasticity estimated in the most recent studies using aggregated data lay in the narrower range of -0.2 to -0.5, and that the same range applied to econometric studies using individual-level data.[[1]](#footnote-1)

A meta-analysis uses formal statistical methods to synthesize results from different quantitative studies of the same question, producing an overall or average estimate that is more precise than the results of any single study. Meta-analyses of elasticity for cigarettes are not as common as narrative reviews. An early meta-analysis by Andrews and Franke (1991) of 41 studies (25 of which were from the US) found a point estimate of -0.36 for the price elasticity of demand for cigarettes. These authors also found that elasticity decreased in magnitude over the period studied, becoming more inelastic (i.e., closer to zero). A more recent meta-analysis by Gallet and List (2003) covered 523 price-elasticity estimates from 86 empirical studies of the demand for cigarettes. The median price elasticity, whether short-run or long-run, was about -0.4. This study concurred with Chaloupka and Warner (2000) that demand for cigarettes became more inelastic over time.

In summary, an overall price elasticity of demand for cigarettes of **-0.4** appears to accurately reflect the scientific literature on the subject. A figure of -0.4 has been stated by the World Bank (for high-income countries such as the US) and tobacco-control handbooks (IARC, 2011, p.350) when a single or consensus figure is desired. And while some studies have found higher price elasticities for cigarettes, particularly some studies making use of retail scanner data instead of aggregate or individual-level data,[[2]](#footnote-2) DeCicca & Kenkel (2015) show that if anything the agreed-upon consensus estimate of -0.4 is too large (in magnitude) to explain why smoking declined as slowly as it did in the recent decades of large tax increases in the US.

These price elasticities are for the aggregate quantity demanded of cigarettes. Decreases in the quantity demanded can be decomposed into fewer people smoking (the *extensive margin*) and remaining smokers consuming less than they did before (the *intensive margin*). The conventional wisdom as distilled from the literature holds that about half of the overall price elasticity stems from each margin (Chaloupka & Warner, 2000; IARC, 2011; DeCicca & Kenkel, 2015).

The price elasticity of demand for cigarettes is often found to vary among groups of people. For example, the price elasticity has generally been found to be higher in magnitude (more elastic) for younger people and youth, likely because the lower disposable income of such individuals makes them more price-sensitive (Kjeld et al., 2021). However, the same is true for demand for ENDS, and there is not enough empirical evidence yet to suggest that the *relative* elasticities for cigarettes and ENDS change markedly with age. Other studies show that the price elasticity is not constant across the range of possible prices, but instead is higher at higher prices (Tauras et al., 2016). This opens the possibility that as tobacco taxes continue to increase, the price elasticity will as well. As with the results for age, however, the same is likely true for ENDS and it remains unknown whether the ratio of the elasticities would change materially.

### Demand for ENDS

Given the recency of the widespread availability and usage of ENDS, the econometric literature estimating demand for these products is much smaller than for cigarettes. One recent study summarized the extant results on the price elasticity of demand for ENDS with the range of −0.78 and −2.1.[[3]](#footnote-3) A meta-analysis from a few years ago found a median elasticity estimate for e-cigarettes of -1.8 (Jawad et al., 2018). The table below shows all the available econometric estimates of the price elasticity of demand for ENDS that could be found. A few studies using individual data from youths only are excluded, as are purely experimental (stated preference or non-market transaction) studies apart from the oft-cited discrete choice experiment of Pesko et al. (2016).[[4]](#footnote-4) The summary figures mentioned above, along with the figures in the table from individual studies, imply that the price elasticity of demand for ENDS is much higher than for cigarettes.

Table 1: Studies containing estimates of own-price elasticity of demand for ENDS

| Study | Data | Unit of observation | Elasticity estimates | Notes |
| --- | --- | --- | --- | --- |
| Huang et al. (2014) | Retail scanner data from food and drug stores, mass merchandisers, and convenience stores. US states. | Aggregated to store type in a retail market. Separate product categories: disposable and reusable ENDS. Quarterly. | Around -1.2 (disposable e-cigarettes).  Around -1.9 (reusable e-cigarettes) | Log-log demand equation. Treats prices as exogenous. |
| Pesko et al. (2016) | Survey data from a discrete choice experiment. | An individual. | -1.8 for disposable ENDS. | Logit model. Data are from stated preferences and do not represent actual market transactions. |
| Stoklosa et al. (2016) | Retail scanner data from supermarkets, convenience stores, and gas stations. Six EU countries. | Aggregated to product type (e-cigarettes and cigarettes) in a country. | Baseline results: -0.79 to -0.83.  Myopic addiction model: -0.26 to ‑0.27 for short-run elasticity; -1.13 to -1.18 for long-run elasticity | Does not include refills for ENDS (liquids or cartridges). Log-log demand equation. Possibly less relevant since data are not from the US |
| Zheng et al. (2017) | Retail scanner data from convenience stores and gas stations. United States. | Aggregated to product type in a retail market. Separate product categories: cigarettes, e-cigarettes, four other tobacco categories. Four-week periods. | Conditional on total tobacco expenditure: -2.05  Unconditional: ‑2.05  Single-equation estimate: ‑2.82 | Two-level Almost Ideal Demand System for six tobacco products. Treats prices as exogenous. |
| Yao et al. (2020) | Retail scanner data from food, drug, and convenience stores and mass merchandisers. California. | Aggregated to store type in a retail market. Separate product categories: disposable and reusable ENDS. Quarterly. | Disposable e-cigarettes: -0.37  Reusable e-cigarettes: -0.20 | Log-log demand equations. Treats prices as exogenous. |
| Cotti et al. (2022) | Retail scanner data from food, drug, and convenience stores and mass merchandisers. United States. | Locality (state or county) and quarter by product (cigarettes, e-cigarettes, and three other tobacco products. | All e-cigarettes: ‑2.1 to -2.25  Tobacco-flavored e-cigarettes: -1.46  Menthol/mint flavored e-cigarettes: -1.07  Other flavored e-cigarettes: -3.44 | Linear-linear IV model, using taxes as instruments for prices. Excludes ENDS without nicotine. Refill cartridges are analyzed separately from devices and kits. ENDS are separated by flavor: tobacco flavor, mint and menthol, and other. |
| Allcott & Rafkin (2022) | Retail scanner data from food, drug, and convenience stores and mass merchandisers. US. | Locality (states and 2 counties) and quarter by individual product UPC. | Baseline estimation: -1.32  Six other estimates: -1.67 to -1.09, with median -1.30. | Log-log IV model, using taxes as instruments for prices. |

It is important to note that except for two cases *all* of the price elasticities are greater in magnitude than the consensus figure of -0.4 for cigarettes.[[5]](#footnote-5) A reasonable pair of estimates for the price elasticity of ENDS demand to use for illustrative purposes in the main text would appear to be **-1.3** and **-2.3**. The former estimate is from Allcott and Rafkin (2022). The latter estimate, from Cotti et al. (2022), was produced from the most recent and carefully designed econometric study. Between these two estimates lie the consensus figure from the meta-analysis of Jawad et al. (2018) and most of the other estimates found in the literature. The only major results less elastic than -1.3 are those of Stoklosa et al. (2016), but those are not from consumers in the US

### Cross-product substitution

While cigarettes and ENDS could theoretically be either complements or substitutes, the consensus of the empirical literature appears to be that the two types of products are substitutes. The meta-analysis by Jawad et al. (2018) found that he median cross-price elasticity of demand for ENDS with respect to price changes for cigarettes was 1.2, or that a 1% increase in the price of cigarettes leads to 1.2% more quantity demanded of e-cigarettes. Results from individual studies reporting econometric estimates of cross-price elasticities are in the table below. Note that positive cross-price elasticities imply that the two products are substitutes, while negative cross-price elasticities would imply that they are complements. In the table, notation ε*ENDS,cig* means the elasticity of demand for ENDS with respect to changes in the price of cigarettes and ε*cig,ENDS* means the elasticity of demand for cigarettes with respect to changes in the price of ENDS.

Table 2: Studies containing estimates of cross-price elasticity of demand for ENDS and cigarettes

| Study | Data | Unit of observation | Elasticity estimates | Notes |
| --- | --- | --- | --- | --- |
| Huang et al. (2014) | See previous table | See previous table | ε*ENDS,cig*= 0.54 for disposable ENDS. | Estimate of ε*ENDS,cig* is statistically significant at the 10% level only.  Estimate of ε*ENDS,cig* for reusables is positive but not statistically significant. See also notes in previous table. |
| Pesko et al. (2016) |  |  |  |  |
| Stoklosa et al. (2016) | See previous table | See previous table | Baseline model: ε*ENDS,cig*= 3.60 to 4.55  Myopic addiction model: ε*ENDS,cig*= 1.5 for short-run elasticity; about 6.5 for long-run elasticity. | One of the two long-run elasticities reported is significant at the 10% level only; all other estimates are significant at the 1% or 5% levels. See also notes in previous table. |
| Zheng et al. (2017) | See previous table | See previous table | Conditional on total tobacco expenditure: ε*ENDS,cig*= 1.86, ε*cig,ENDS*= 0.004  Unconditional: ε*ENDS,cig*= 1.81, ε*cig,ENDS* = 0.004  Single-equation estimate: ε*ENDS,cig*= 1.86 | The single-equation estimate of ε*cig,ENDS* was not significant. See also notes in previous table. |
| Yao et al. (2020) | See previous table | See previous table | ε*ENDS,cig*= 1.74 for reusable ENDS. | Estimate of ε*ENDS,cig* for disposables is positive but not statistically significant. Estimates of ε*cig,ENDS* are near zero and not significant for both types of ENDS. |
| Saffer et al. (2020) | Individual survey data for adults (CPS-Tobacco Use Supplement). Minnesota. |  | Participation elasticity for smoking (with respect to changes in price of ENDS): 0.13 | Participation elasticity is for the extensive margin only and mainly reflects impacts on cessation and relapse. Estimate is an arc elasticity for a discrete change observed in the data. Authors state estimate is a lower bound. |
| Cotti et al. (2022) | See previous table | See previous table | ENDS as a group: ε*ENDS,cig*= 1.14, ε*cig,ENDS* =0.46  Tobacco-flavored e-cigarettes: ε*ENDS,cig*= 0.85  Menthol/mint flavored e-cigarettes: ε*ENDS,cig*= 0.66  Other flavored e-cigarettes: ε*ENDS,cig*=1.81  Non-flavored cigarettes: ε*cig,ENDS* = 0.53  Menthol cigarettes: ε*cig,ENDS* = 0.29 |  |
| Allcott & Rafkin (2022) | See previous table |  | ε*ENDS,cig* = 0.22 to 0.84  ε*cig,ENDS* = 0.75 to 1.72 | All elasticity estimates for ENDS (7 each for ε*ENDS,cig* and ε*cig,ENDS*) are positive but statistically insignificant.  The range given for ε*cig,ENDS* includes only the three estimates that are apparently significant at the 5% level (the authors report standard errors but not significant stars). Two of the insignificant estimates are negative. |

Some of the estimates in the table require comment. The participation elasticity from Saffer et al. (2020) can be converted to the more-usual quantity elasticity (to make it comparable to the other estimates in the table) if the fraction of the total elasticity coming from the extensive margin is known. For cigarettes, the conventional wisdom holds that about half of the price elasticity stems from the participation elasticity. For e-cigarettes, less is known about these margins, but if the same division of total elasticity into its margins holds for ENDS as for cigarettes, Saffer et al.’s (2020) participation elasticity estimate of 0.13 can be converted to a cross-price elasticity (ε*cig,ENDS*) of roughly 0.26. These authors also discuss why their estimate is only a lower bound on the true elasticity.

Allcott and Rafkin’s (2022) estimates are noteworthy because their methodology leads to results that both less certain and outside the range of the other estimates in the literature. None of their estimates of ε*ENDS,cig* are statistically significant, which means that they cannot reject the null hypotheses that demands for ENDS and cigarettes are independent (which would strain credulity and is not claimed to be the case by the authors). However, the lack of significance found in their study results from large standard errors (i.e., imprecision in their estimates) rather than a precise finding of independent demand. That is, their results appear to reflect a lack of statistical power[[6]](#footnote-6) more than a confident statement that the null hypothesis is actually true. Furthermore, their preferred estimate of ε*ENDS,cig* = 0.22, which is lower than all the other estimates in the table, is produced by a model that includes state-specific linear time trends. As discussed in Cotti et al. (2022, footnote 4), including such trends may obscure the causal cross-price effects (and, indeed, Allcott and Rafkin’s (2022) estimate of ε*ENDS,cig* when not including the state trends is much larger, 0.84, and is highly statistically significant). Allcott and Rafkin’s (2022) estimates for ε*cig,ENDS* are, on the other hand, much larger than all the other estimates in the table. Due to the outlying nature of these cross-elasticities and the other issues discussed here, they are not adopted here for the computations in the main text.

The estimates of cross-price elasticity across the various studies display significant variation. Setting aside the low, insignificant estimate of Allcott and Rafkin (2022), the estimates for ε*ENDS,cig* range from 0.54 on the low end to 6.5 on the high end, although the different types of products (e.g., disposables vs. reusables), elasticities (short-run, long-run), and modeling approaches (static, dynamic, differing functional forms, etc.) make direct comparison of estimates problematic. Ignoring possible noncomparability for the moment, the high end for a reasonable range of estimates for ε*ENDS,cig* appears to be 1.8, implying that a 1% increase in cigarette prices increases demand for e-cigarettes by 1.8%, showing that the two products are highly substitutable. The lower estimates from the careful study of Cotti et al. (2022), ε*ENDS,cig* = 1.1 are also of interest, given the high-quality empirical methods and recent data used. Thus for purposes of the computations in the text a reasonable range for ε*ENDS,cig* will be taken to be **1.1** to **1.8**. There are fewer estimates of the converse elasticity, ε*cig,ENDS*, and they have a broad range from almost **0** to **1.7**.

### Income elasticity of demand

In contrast with estimates of price elasticity, there is little to no consensus on the income elasticity of demand for cigarettes. Until recently, the only point of agreement was that the income elasticity was not negative (IARC, 2011). Estimates typically lay between zero and one, indicating that cigarettes are a *normal good* but not a *luxury good*. The meta-analysis of Andrews and Franke (1991) found that the mean income elasticity from 37 studies performed through 1990 was 0.36. However, evidence since then suggests that the income elasticity of demand for cigarettes has declined over time in the US (IARC, 2011, p.350). One very recent study found that the income elasticity has even turned mildly negative in high income countries (Nargis, et al., 2020), although this is estimated with highly aggregated data. An income elasticity of **0.1** appears to be a reasonable choice, based on studies published since 1990 (see the review in IARC, 2011). However, it is also defensible to view an income elasticity of zero as a reasonable approximation, given that the estimates are often small and, in many studies, the estimated income elasticity does not differ significantly from zero (in the statistical sense).

For ENDS, no estimates of income elasticity were found in the literature. However, the results for the conditional expenditure elasticities from Hovhannisyan et al. (2020, not yet peer reviewed), which are 0.895 for cigarettes and 2.533 for e-cigarettes, imply that the income elasticity of ENDS is 2.8 times the income elasticity of cigarettes.[[7]](#footnote-8) Thus if the income elasticity of cigarettes is 0.1, the income elasticity of ENDS would be around **0.3**.

## Mathematical results for optimal tax rates

### Rationale 1 (minimizing deadweight loss)

The equation on page 8 for the optimal tax rates under the criterion of maximizing social surplus (traditionally defined) is derived here, following Auerbach (1985). Although the Ramsey Rule has been derived for many sets of assumptions in the literature, it is most common to use compensated elasticities in the formulas. Given the need to match any optimal tax formula to published estimates of the relevant elasticities, which are universally computed for unconditional demand functions, I (re)derive the Ramsey Rule here using uncompensated elasticities.

Consider a representative consumer with indirect utility function *V*(*p*,*I*), where *p* is the vector of tax-included (i.e., consumer) prices and *I* is the consumer’s income. Define *x* as the vector of Marshallian demand for the set of goods; since demand depends on prices and income, *x* is a function: *x*(*p*,*I*). Let *T* be the desired total tax revenue that must be created. Let the vector of unit taxes be *t* and the pre-tax cost of goods (i.e., the producer prices) be *q*. As elsewhere in the text it is assumed that *q* is constant and that the goods are competitively supplied, so there are no excess profits to consider. As usual in such mathematical approaches, there is a numeraire good 0 with unit tax normalized to be zero (thus, zero is the “outside good”—here, representing purchases other than ENDS and cigarettes).

The social planner’s goal is to minimize deadweight loss (or, equivalently, to maximize *V*) subject to meeting the goal for tax revenue. The revenue constraint is:

The Lagrangian for the constrained maximization problem is:

After noting that derivatives with respect to taxes are the same as derivatives with respect to prices, since a dollar of extra tax increases consumer prices by a dollar, the first-order condition for a maximum can be written:

Roy’s identity from microeconomic theory implies that , where *μ* is the marginal utility of income . Thus , and substituting this into the expression above and suppressing the arguments of the functions yields:

Add and rearrange some terms:

By definition of the cross-price elasticity,

and so we have

where is the expenditure on (equivalently, tax-inclusive revenue from) good *i*. Since the right side of the equation is the same regardless of *i*, we can expand the sums and set the left sides for *i* = 1,2 equal to each other:

|  | (A-1) |
| --- | --- |

where as in the text and .

If there are no cross-price effects, then this equation simplifies to the simple Ramsey Rule given in section III.A in the main text. If the demands are not independent, then the rule can be expressed in terms of price and income elasticities as follows. First, note that the relationship between the cross-price Marshallian (uncompensated) elasticities is:

|  | (A-2) |
| --- | --- |

where the *I* superscript denotes an income elasticity and is the share of total income spent on good *i*.[[8]](#footnote-9) Using this relationship in the optimal tax formula given in equation (A-1) leads to:

|  | (A-3) |
| --- | --- |

Which is the expanded Ramsey Rule stated in the main text on page 8.

### Implied specific tax rates from the Ramsey Rule

The relative tax rates computed by the Ramsey Rule are stated in terms of the unit tax rate as a fraction of the tax-inclusive price. What does this efficient-taxation rule imply for the specific (i.e., unit) taxes on the commodities themselves? The median state ($1.80) specific tax on cigarettes is in Nevada, which with the federal tax of $1.01 leads to a total tax of $2.81 per pack (CfTFK, 2021). Cigarette prices in Nevada average about $6.80 per pack.[[9]](#footnote-10) Thus τ*cig* = 2.81 ÷ 6.8 = 0.44. If the optimal ratio of the tax rates is 4.5, the midpoint of the two multiples above, then τ*ENDS* = 0.098. This latter tax rate corresponds to a tax of about $0.108 on a (pre-tax) dollar’s worth of e-cigarettes.[[10]](#footnote-11) To see that this tax level is indeed much lower for ENDS than for cigarettes, note that if, in the absence of taxes, an e-cigarette product cost the same as cigarettes, then the total tax for the e-cigarette product would be only $0.40 (compared to the $2.81 tax on the pack of cigarettes).[[11]](#footnote-12)

### Relaxing the assumption of constant marginal cost

The formulas derived above assume constant marginal cost. Note that relaxing the assumption of constant marginal cost is unlikely to change the relative comparison of the tax rates. With linear nonconstant supply functions ENDS would have a higher ad valorem tax rate than cigarettes if, in addition to having more elastic demand, ENDS also has a more elastic supply curve (Yang and Stitt, 1995). There are no direct estimates of supply elasticities available for cigarette and ENDS manufacturing, but the former is highly likely to be smaller than the latter. The mature technology used to manufacture cigarettes is likely to result in economies of scale (see Bain’s (1954) classic study of American industry for evidence from the mid-20th century) and relatively flat industry supply curves (and hence low supply elasticity). On the other hand, in a newer market like ENDS with a great multiplicity of heterogeneous products, a variety of production processes with varying costs are undoubtedly employed, leading to a more elastic supply curve.

### The terms involving the budget shares in the expanded Ramsey Rule are likely very small

It is mentioned in the text that the terms involving the product of the difference in the income elasticities and the budget shares can be ignored in equation (A-3). The reason follows. First, the difference in the income elasticities is only around 0.2 in magnitude at best guess, and may be lower, given the estimates discussed above. Second, the income elasticities are multiplied in the equation by the share of the budget spent on cigarettes or ENDS. These budget shares are very small in the US (about 1.2% for cigarettes and 0.004% for ENDS on average, which is the appropriate measure for optimal taxes computed for the representative consumer). These figures are computed from the data presented in Zheng et al. (2017) and are for years 2009-2014.[[12]](#footnote-13) These two considerations imply that the terms involving the income elasticities can safely be ignored.

### Rationale 3 (public health)

#### Main results

The equation on page 12 for the optimal tax rates under the public health criterion is derived here. With the same set-up for the representative consumer as for rationale 1, let *H*(*x*) be the total public health harm created when amounts *x* of the goods are consumed. These harms include both private and external harms. It is assumed that the outside good involves no health harms.

The social planner’s goal is to minimize deadweight loss (or, equivalently, to maximize *V*) subject to meeting a fixed goal of health improvement. The goal is:

where *p*0 is the initial price before the new taxes are chosen. The health constraint can be written:

The Lagrangian for the constrained maximization problem is:

The first-order condition for a maximum can be written:

Application of Roy’s identity to the expression above yields:

Dividing both sides by and restating in terms of elasticities, we have:

where as above. For economy of notation, denote the marginal harm from *xi* to be *Hi*. Since the right side of the equation is constant across *i*, we have for goods 1 and 2:

Manipulate the terms:

so that

or

|  | (A-4) |
| --- | --- |

If there are no cross-price effects, then this equation simplifies to the one given on page 12 in the main text. If the demands are not independent, then the rule can be expressed in terms of price and income elasticities as follows. Using relationship (A-2), the optimal tax formula in equation (A-4) leads to:

|  | (A-5) |
| --- | --- |

Substituting *pi*= *ti* + *qi*, the optimal tax condition (A-5) can be written as:

|  | (A-6) |
| --- | --- |

where *E* is the modified elasticity ratio:

that appears on the right side of equations (A-3) and (A-5).

Based on equation (A-6), the unit tax on good 1 is larger than the unit tax on good 2 if:

or

To allow direct comparability of the unit taxes, set the units of the two goods to be a (pre-tax) dollar’s worth of output. Then the inequality simplifies to

which (assuming positive tax rates) holds if and only if the expression in the parentheses is negative. Thus we have:

For the case with no income effects or cross-elasticities, then cigarettes are taxed at a relatively higher rate if

#### Results for youth-specific nicotine harms

This section contains the calculations underlying the claim in section IV that even if nicotine harms the developing brains of youth and young adults, the conclusion that ENDS should be taxed to ensure that they are less expensive than cigarettes still holds under rationale 3 (see also footnote 37 regarding the claim). Denote the marginal harm caused by nicotine itself for youth, if it exists, as , and let the other marginal harms to any user of cigarettes or ENDS be denoted and , respectively. Then the condition for the tax-inclusive price of ENDS to be lower than that for cigarettes under rationale 3, from equation (3), is:

where the figure used for on the right side of the inequality uses the formula for nonzero cross-elasticities. This can be rewritten as

If the pessimistic figure of 0.37 is used for the harm ratio on the right of the inequality (i.e., the mean opinion from the survey mentioned in footnote 8), then the inequality is satisfied if the nicotine-specific harm is no more than 47% of the other harm from smoking. If, instead, the median opinion of 0.25 for is used, then ENDS should be less expensive than cigarettes by this rationale if is less than 75%. If Public Health England’s ratio of 1:20 for is used, then ENDS should be less expensive than cigarettes if is less than 122%.

## Other reduced-harm tobacco products

By and large, the same conclusions found for the relative tax rates for ENDS and cigarettes also hold for heated tobacco and snus as well. However, the conclusions must necessarily be more tentative since these alternative products are less studied. As with the analysis for ENDS and cigarettes, the conclusion that other reduced-risk products should be taxed at lower rates than cigarettes depends (to varying degrees depending on the rationale for the taxation) on their harm to health, promotion of cessation, substitution in demand, and externalities created by consumption, all relative to smoking.

### Harm

While not harm-free, snus is “clearly less harmful” (Foulds et al., 2003) and “associated with substantially fewer health hazards” (Rutqvist et al., 2011) than smoking cigarettes. One study found that switching from cigarettes to Swedish snus has nearly the same impact on life expectancy as cessation (Gartner et al., 2007). Snus has much lower levels of tobacco-specific nitrosamines (TSNAs) than cigarettes. Expert consensus is that low-TSNA smokeless tobacco such as snus has no more than 10% of the health risk of smoking (Levy et al., 2004), although it must be noted that some North American brands of snus have more TSNAs than Swedish snus (Lawler et al., 2020).

Less is known about the relative risks of heated tobacco products, and they are not risk-free. The evidence, however, indicates that they to expose users to fewer harmful constituents than smoking cigarettes (Jankowski, et al., 2018; McNeill et al., 2018), a level of exposure that one study termed “substantially lower” than for cigarettes (Simonavicius et al., 2019). The FDA has approved a few snus and heated tobacco products for marketing as “modified risk” products that offer significantly less exposure to harmful chemicals than cigarettes. The FDA rulings allow various IQOS heated tobacco products manufactured by Philip Morris International to be marketed with the claim that they “significantly reduce the production of harmful and potentially harmful chemicals” and that “scientific studies have shown that switching completely from conventional cigarettes to the IQOS system significantly reduces your body’s exposure to harmful or potentially harmful chemicals.”[[13]](#footnote-14) In contrast, the FDA allows the General brand smokeless tobacco products from Swedish Match to claim that “using General Snus instead of cigarettes puts you at a lower risk of mouth cancer, heart disease, lung cancer, stroke, emphysema, and chronic bronchitis”.[[14]](#footnote-15)

### Cessation from smoking

In Sweden, where snus originated and is widely used among former smokers, the product appears to have contributed to the country’s low smoking rate by preventing initiation and facilitating cessation (Ramstrom & Foulds, 2008). A systematic review of clinical trials found that snus indeed increases cessation from smoking, including in the US (Rutqvist et al., 2013). There is no scientific evidence yet regarding the effect of heated tobacco use on cessation (Tattan-Birch et al., 2022), although one-fifth of users in Korea report being ex-smokers (Kim et al., 2021).

### Substitution with cigarettes

There is no consensus in the literature as to whether smokeless tobacco is a substitute, complement, or neither to cigarettes, with several studies arriving at each conclusion, and no econometric literature at all yet regarding that question for heated tobacco products. Regardless of whether these products are economic substitutes with cigarettes, demand for all of them decreases at higher prices, and so higher taxes discourage their use.

### Demand elasticity

Less is known about the elasticity of demand for other reduced-harm tobacco products. Shang et al. (2020) find that demand for heated tobacco products is “highly responsive to price changes”. Efficient taxes would therefore be lower on such products than on cigarettes, as with ENDS. Demand elasticity for snus and nicotine gum has also been found to be higher than for cigarettes (Stein et al., 2017), although other studies conclude that the price elasticity of demand for smokeless tobacco is the same as or lower than for cigarettes (Huang et al., 2018).[[15]](#footnote-16) Under this rationale, then, the tax rate on heated tobacco products would also be lower than the tax on cigarettes, but it is unclear how the optimal tax on smokeless tobacco would compare to the optimal cigarette tax.

### Externalities

Smokeless tobacco products entail no secondhand exposure at all. Heated tobacco products do create passive exposure to particulates, but only a quarter or less of the amount that cigarettes release and for a much shorter duration (McNeill et al., 2018; Protano et al., 2016). Since any public-finance externalities would be no larger with these alternative products than from smoking, and would probably be much lower, optimal Pigouvian taxes on smokeless products and heated tobacco would also be lower than on cigarettes.

### Internalities

How would taxes on other reduced-harm products compare with those on cigarettes under rational 4? The epidemiologically correct perception that smokeless tobacco products are less risky than cigarettes was held by a majority of respondents in only 18% of studies on the subject (Czoli et al., 2017). Less than a quarter of current and recent smokers in one survey agreed with the statement that “heated tobacco products are less harmful than regular cigarettes” (Fung et al., 2020). Data from the PATH study show that 62.7% [61.9, 63.5] of adults believe that snus is about as harmful as smoking, and 29.9% [29.1, 30.7] believe that snus is more harmful.[[16]](#footnote-17) The survey question did not distinguish between Swedish snus, for which these beliefs are nearly certainly incorrect, and American smokeless tobacco, not all of which is low-TSNA (as mentioned above).

## Additional References

*References in the appendix that are also included in the main text are not listed here.*

Andrews, R. L., & Franke, G. R. (1991). The determinants of cigarette consumption: A meta-analysis. *Journal of Public Policy & Marketing*, 10(1), 81–100. <https://doi.org/10.1177/074391569101000107>

Bain, J. S. (1954). Economies of scale, concentration, and the condition of entry in twenty manufacturing industries. *American Economic Review*, 44(1), 15-39. <https://www.jstor.org/stable/1803057>

Campaign for Tobacco-Free Kids (CfTFK). (2021). State cigarette excise tax rates & rankings. <https://www.tobaccofreekids.org/assets/factsheets/0097.pdf>

Cantrell, J., Huang, J., Greenberg, M. S., Xiao, H., Hair, E. C., & Vallone, D. (2020). Impact of e-cigarette and cigarette prices on youth and young adult e-cigarette and cigarette behaviour: Evidence from a national longitudinal cohort. *Tobacco Control*, 29(4), 374–380. <https://doi.org/10.1136/tobaccocontrol-2018-054764>

Chaloupka, F. J., & Warner, K. E. (2000). The economics of smoking. *Handbook of Health Economics*, 1, 1539-1627.

DeCicca, P., & Kenkel, D. (2015). Synthesizing econometric evidence: The case of demand elasticity estimates. *Risk Analysis*, 35(6), 1073-1085. <https://doi.org/10.1111/risa.12363>

Foulds, J., Ramstrom, L., Burke, M., & Fagerström, K. (2003). Effect of smokeless tobacco (snus) on smoking and public health in Sweden. *Tobacco Control*, 12(4), 349-359. <http://dx.doi.org/10.1136/tc.12.4.349>

Fung, M. D. T., Diemert, L. M., Bo, Z., O'Connor, S., & Schwartz, R. (2020). Awareness and perceived risk of heated tobacco products. *Tobacco Regulatory Science*, 6(1), 15-19. <https://doi.org/10.18001/TRS.6.1.2>

Gallet, C. A., & List, J. A. (2003). Cigarette demand: A meta‐analysis of elasticities. *Health economics*, 12(10), 821-835. <https://doi.org/10.1002/hec.765>

Gartner, C. E., Hall, W. D., Vos, T., Bertram, M. Y., Wallace, A. L., & Lim, S. S. (2007). Assessment of Swedish snus for tobacco harm reduction: An epidemiological modelling study. *The Lancet*, 369(9578), 2010-2014. <https://doi.org/10.1016/S0140-6736(07)60677-1>

Hovhannisyan, V., Bastian, C. T., & Devadoss, S. (2020). An empirical analysis of tobacco addiction. <https://ageconsearch.umn.edu/record/304425/files/18665.pdf>

Huang, J., Gwarnicki, C., Xu, X., Caraballo, R. S., Wada, R., & Chaloupka, F. J. (2018). A comprehensive examination of own-and cross-price elasticities of tobacco and nicotine replacement products in the US. *Preventive Medicine*, 117, 107-114. <https://doi.org/10.1016/j.ypmed.2018.04.024>

IARC Working Group on the Effectiveness of Tax and Price Policies for Tobacco Control, & International Agency for Research on Cancer. (2011). *Effectiveness of tax and price policies for tobacco control* (Ser. IARC Handbooks of Cancer Prevention, v. 14). International Agency for Research on Cancer.

Jankowski, M., Brożek, G. M., Lawson, J., Skoczyński, S., Majek, P., & Zejda, J. E. (2019). New ideas, old problems? Heated tobacco products–A systematic review. *International Journal of Occupational Medicine and Environmental Health*, 32(5), 595-634. <https://doi.org/10.13075/ijomeh.1896.01433>

Jawad, M., Lee, J. T., Glantz, S., & Millett, C. (2018). Price elasticity of demand of non-cigarette tobacco products: A systematic review and meta-analysis. *Tobacco Control*, 27(6), 689–689. <https://doi.org/10.1136/tobaccocontrol-2017-054056>

Kim, J., Lee, S., Kimm, H., Lee, J. A., Lee, C. M., & Cho, H. J. (2021). Heated tobacco product use and its relationship to quitting combustible cigarettes in Korean adults. *Plos One*, 16(5), e0251243. <https://doi.org/10.1371/journal.pone.0251243>

Kjeld, S. G., Jørgensen, M. B., Aundal, M., & Bast, L. S. (2021). Price elasticity of demand for cigarettes among youths in high-income countries: a systematic review. *Scandinavian Journal of Public Health*, online pre-print. <https://doi.org/10.1177/14034948211047778>

Lawler, T. S., Stanfill, S. B., Tran, H. T., Lee, G. E., Chen, P. X., Kimbrell, J. B., ... & Watson, C. H. (2020). Chemical analysis of snus products from the United States and northern Europe. *PLoS One*, 15(1), e0227837. <https://doi.org/10.1371/journal.pone.0227837>

Levy, D. T., Mumford, E. A., Cummings, K. M., Gilpin, E. A., Giovino, G., Hyland, A., ... & Warner, K. E. (2004). The relative risks of a low-nitrosamine smokeless tobacco product compared with smoking cigarettes: estimates of a panel of experts. *Cancer Epidemiology and Prevention Biomarkers*, 13(12), 2035-2042. <https://doi.org/10.1158/1055-9965.2035.13.12>

McNeill, A., Brose, L. S., Calder, R., Bauld, L., Robson, D. (2018). *Evidence review of e-cigarettes and heated tobacco products 2018*. Public Health England. <https://assets.publishing.service.gov.uk/government/uploads/system/uploads/attachment_data/file/684963/Evidence_review_of_e-cigarettes_and_heated_tobacco_products_2018.pdf>

Nargis, N., Stoklosa, M., Shang, C., & Drope, J. (2021). Price, income, and affordability as the determinants of tobacco consumption: A practitioner’s guide to tobacco taxation. *Nicotine and Tobacco Research*, 23(1), 40-47. <https://doi.org/10.1093/ntr/ntaa134>

Protano, C., Manigrasso, M., Avino, P., Sernia, S., & Vitali, M. (2016). Second-hand smoke exposure generated by new electronic devices (IQOS® and e-cigs) and traditional cigarettes: Submicron particle behaviour in human respiratory system. *Annali di Igiene, Medicina Preventiva e di Comunità*, 28(2), 109-112.

Ramström, L. M., & Foulds, J. (2006). Role of snus in initiation and cessation of tobacco smoking in Sweden. *Tobacco Control*, 15(3), 210-214. <http://dx.doi.org/10.1136/tc.2005.014969>

Rutqvist, L. E., Curvall, M., Hassler, T., Ringberger, T., & Wahlberg, I. (2011). Swedish snus and the GothiaTek® standard. *Harm Reduction Journal*, 8(1), 1-9. <https://doi.org/10.1186/1477-7517-8-11>

Rutqvist, L. E., Fry, J. S., & Lee, P. N. (2013). Systematic review of Swedish snus for smoking cessation based on primary subject data from randomised clinical trials. *Journal of Smoking Cessation*, 8(1), 33-44. <https://doi.org/10.1017/jsc.2013.10>

Shang, C., Dauchy, E. P., & Feldman, N. (2020). The price elasticity of demand for heated tobacco products. *Tobacco Prevention & Cessation*, 6(Supplement). <http://dx.doi.org/10.18332/tpc/128063>

Simonavicius, E., McNeill, A., Shahab, L., & Brose, L. S. (2019). Heat-not-burn tobacco products: a systematic literature review. *Tobacco Control*, 28(5), 582-594. <http://dx.doi.org/10.1136/tobaccocontrol-2018-054419>

Stein, J. S., Wilson, A. G., Koffarnus, M. N., Judd, M. C., & Bickel, W. K. (2017). Naturalistic assessment of demand for cigarettes, snus, and nicotine gum. Psychopharmacology, 234(2), 245-254. <https://doi.org/10.1007/s00213-016-4455-y>

Tattan-Birch, H., Hartmann-Boyce, J., Kock, L., Simonavicius, E., Brose, L., Jackson, S., ... & Brown, J. (2022). Heated tobacco products for smoking cessation and reducing smoking prevalence. Cochrane Database of Systematic Reviews, (1). <https://doi.org/10.1002/14651858.CD013790.pub2>

Tauras, J., Pesko, M., Huang, J., Chaloupka, F.J., & Farrelly, M.C. (2016). The Effect of Cigarette Prices on Cigarette Sales: Exploring the Heterogeneity in Price Elasticities at High and Low Prices. NBER. <https://www.tobacconomics.org/files/research/304/Tauras_CigPrice_NBER_2016.pdf>

Yang, C. W., & Stitt, K. R. (1995). The Ramsey rule revisited. *Southern Economic Journal*, 61(3), 767-774. <http://dx.doi.org/10.2307/1060996>

1. See IARC (2011, p.108) for the former and IARC (2011, p.176) for the latter. [↑](#footnote-ref-1)
2. For example, the study of Zheng et al. (2017) finds a price elasticity estimate of around -1.0 for cigarettes. One reason that such studies return higher elasticity estimates is that they do not include all possible retail outlets for tobacco (e.g., Zheng et al. (2017) include data from convenience stores only). Thus, higher prices at the included stores in the dataset will merely drive some sales to stores not captured in the data. Another possible reason that studies using retail scanner data arrive at higher estimates of price elasticity is that they do not adequately account for cross-border or illicit sales. If so, then legal, fully-taxed sales in a particular location will appear to be more price-sensitive than actual consumption is. Finally, it is worth noting that a recent high-quality study using retail scanner data and careful econometric methods found a price elasticity for cigarettes of -0.39 (Cotti et al., 2022), in line with the consensus estimate. [↑](#footnote-ref-2)
3. Yurekli et al. (2020), summarizing results from Huang et al. (2014), Pesko et al. (2016, 2020), Stoklosa et al. (2016), Zheng et al. (2017), and a previous version of Cotti et al. (2022) [↑](#footnote-ref-3)
4. For example, Cantrell et al. (2020) study the behavior of a sample aged 15-21 years. They found some evidence of substitution between rechargeable ENDS and cigarettes but their estimated own-price effect for ENDS was not statistically significant. Including Pesko et al. (2016) among the studies in the table to follow does not expand the range of the elasticity estimates in the literature reviewed; their own-price elasticity of demand is on the high end but smaller than that of Zheng et al. (2017). Most other experimental studies of demand for ENDS are not performed by economists. [↑](#footnote-ref-4)
5. The two exceptions, both from Stoklosa et al. (2016), are short-run elasticities from a dynamic model. For policy purposes involving tobacco-related health harms the long-run elasticities are more relevant (since many of the potential health harms from smoking or vaping would not appear immediately), and the long-run elasticities from that model are much larger. [↑](#footnote-ref-5)
6. In statistics, *power* is defined as one minus the probability of Type II error, where the latter is the acceptance of the null hypothesis when it is actually false. [↑](#footnote-ref-6)
7. In principle, the income elasticities could be computed from the Almost Ideal Demand System estimated by Hovhannisyan et al. (2020), but they report only second-stage expenditure elasticities and not the first-stage elasticity of the budget share devoted tobacco goods. [↑](#footnote-ref-8)
8. To show this result, begin with the Slutsky equation relating the compensated and uncompensated demand functions:

   where *X* is Marshallian demand and *h* is the Hicksian compensated demand function. Multiplying both sides by and using the symmetry of the cross-partial derivatives of Hicksian demand, we have:
   or
    (a-1)

   where the *U* and *C* superscripts are for uncompensated and compensated elasticities, respectively. Note that due to the symmetry of the cross-partial derivatives of the compensated demand functions, the relationship between the compensated elasticities is:

   (a-2)

   Equations (a-1) and (a-2) imply that

   (a-3)

   Rearranging the terms in equation (a-1) and then switching *i* and *j* subscripts yields:

   (a-4)

   Substitute equation (a-4) into equation (a-3) to arrive at equation (A-2) in the text. [↑](#footnote-ref-9)
9. See CDC’s *The Tax Burden on Tobacco*, cited in the text. [↑](#footnote-ref-10)
10. To check this, see that if the specific tax on ENDS is $0.1084, where the units of ENDS are normalized so that before taxes one unit costs $1, then τ*ENDS* is 0.1084 ÷ (1 + 0.1084) = 0.098, the desired relative tax rate. [↑](#footnote-ref-11)
11. To check this, see that if the pre-tax ENDS price is the same as the pre-tax cigarette price ($3.99 in the median state), then τ*ENDS* is 0.4035 ÷ (3.99 + 0.4035) = 0.0918, τ*cig* is 2.81 ÷ 6.80 = 0.4132, the ratio of these optimal taxes is indeed 0.4132 ÷ 0.0918 = 4.5. [↑](#footnote-ref-12)
12. The budget share for ENDS may be higher today, but it is still much smaller than the budget share for cigarettes for the average consumers since in 2020 total expenditure on cigarettes was still ten times expenditure on ENDS in the US (per Euromonitor’s Passport database). [↑](#footnote-ref-13)
13. See <https://www.fda.gov/media/139797/download>. The rulings also conclude that the products are “appropriate for the protection of public health” but, somewhat paradoxically, stop short of allowing PMI to claim that the products “significantly reduce harm and the risk of tobacco-related disease to individual tobacco users.” [↑](#footnote-ref-14)
14. See <https://www.fda.gov/news-events/press-announcements/fda-grants-first-ever-modified-risk-orders-eight-smokeless-tobacco-products>. [↑](#footnote-ref-15)
15. However, of the studies cited in Huang et al. (2018) finding that elasticity is lower for smokeless tobacco than for cigarettes, only one is both from the past decade and for the US market, and it estimates tax elasticities instead of direct price elasticities. [↑](#footnote-ref-16)
16. Statistics computed by the author from data collected mainly in 2019. See footnote 21 in the main text. [↑](#footnote-ref-17)
